# Supplementary material
Source: MDPI journal article supplement (https://www.mdpi.com/2304-6767/10/10/191)
Supplement: s1 [file s1]

# Effect of Whitening Toothpaste on Surface Roughness and Colour Alteration of Artificially Extrinsic Stained Human Enamel: In Vitro Study

Sarat Suriyasangpetch <sup>1</sup>, Pimduean Sivavong <sup>1</sup>, Boondarick Niyatiwatchanchai <sup>1</sup>, Thanaphum Osathanon <sup>2</sup>, Puliwan Gorwong <sup>3</sup>, Chawalid Pianmee <sup>4</sup>, Dusit Nantanapiboon <sup>1,3,\*</sup>

<sup>1</sup> Department of Operative Dentistry, Faculty of Dentistry, Chulalongkorn University, Bangkok, 10330 Thailand

<sup>2</sup> Dental Stem Cell Biology Research Unit and Department of Anatomy, Faculty of Dentistry, Chulalongkorn University, Bangkok 10330 Thailand

<sup>3</sup> Dental Material Research and Development Center, Faculty of Dentistry, Chulalongkorn University, Bangkok, 10330 Thailand

<sup>4</sup> Dental Department, Surin Hospital, Surin 32000, Thailand

\* Correspondence: dusit.n@chula.ac.th; Tel. +66-2218-8795

## Supplementary Tables:

**Table S1.** LSD hoc test showed multiple comparison of L\*a\*b\* baseline among fives toothpaste for baseline.

| Dependent Variable | (I) Toothpaste                     | (J) Toothpaste                     | Mean Difference (I-J) | Std. Error | Sig.  | 95% Confidence Interval |             |
|--------------------|------------------------------------|------------------------------------|-----------------------|------------|-------|-------------------------|-------------|
|                    |                                    |                                    |                       |            |       | Lower Bound             | Upper Bound |
| L* Baseline        | Oral B Gum and enamel (C)          | ZACT Stain fighter (ZW)            | -0.03375              | 0.32028    | 0.917 | -0.6840                 | 0.6165      |
|                    |                                    | Colgate optic volcano mineral (CW) | -0.04625              | 0.32028    | 0.886 | -0.6965                 | 0.6040      |
|                    |                                    | Oral B 3D Fresh breathe (3DW)      | -0.09250              | 0.32028    | 0.774 | -0.7427                 | 0.5577      |
|                    |                                    | Thepthai herbal toothpaste (TW)    | -0.08375              | 0.32028    | 0.795 | -0.7340                 | 0.5665      |
|                    | ZACT Stain fighter (ZW)            | Oral B Gum and enamel (C)          | 0.03375               | 0.32028    | 0.917 | -0.6165                 | 0.6840      |
|                    |                                    | Colgate optic volcano mineral (CW) | -0.01250              | 0.32028    | 0.969 | -0.6627                 | 0.6377      |
|                    |                                    | Oral B 3D Fresh breathe (3DW)      | -0.05875              | 0.32028    | 0.856 | -0.7090                 | 0.5915      |
|                    |                                    | Thepthai herbal toothpaste (TW)    | -0.05000              | 0.32028    | 0.877 | -0.7002                 | 0.6002      |
|                    | Colgate optic volcano mineral (CW) | Oral B Gum and enamel (C)          | 0.04625               | 0.32028    | 0.886 | -0.6040                 | 0.6965      |
|                    |                                    | ZACT Stain fighter (ZW)            | 0.01250               | 0.32028    | 0.969 | -0.6377                 | 0.6627      |
|                    |                                    | Oral B 3D Fresh breathe (3DW)      | -0.04625              | 0.32028    | 0.886 | -0.6965                 | 0.6040      |
|                    |                                    | Thepthai herbal toothpaste (TW)    | -0.03750              | 0.32028    | 0.907 | -0.6877                 | 0.6127      |
|                    | Oral B 3D Fresh breathe (3DW)      | Oral B Gum and enamel (C)          | 0.09250               | 0.32028    | 0.774 | -0.5577                 | 0.7427      |
|                    |                                    | ZACT Stain fighter (ZW)            | 0.05875               | 0.32028    | 0.856 | -0.5915                 | 0.7090      |
|                    |                                    | Colgate optic volcano mineral (CW) | 0.04625               | 0.32028    | 0.886 | -0.6040                 | 0.6965      |
|                    |                                    | Thepthai herbal toothpaste (TW)    | 0.00875               | 0.32028    | 0.978 | -0.6415                 | 0.6590      |
|                    | Thepthai herbal toothpaste (TW)    | Oral B Gum and enamel (C)          | 0.08375               | 0.32028    | 0.795 | -0.5665                 | 0.7340      |
|                    |                                    | ZACT Stain fighter (ZW)            | 0.05000               | 0.32028    | 0.877 | -0.6002                 | 0.7002      |
|                    |                                    | Colgate optic volcano mineral (CW) | 0.03750               | 0.32028    | 0.907 | -0.6127                 | 0.6877      |
|                    |                                    | Oral B 3D Fresh breathe (3DW)      | -0.00875              | 0.32028    | 0.978 | -0.6590                 | 0.6415      |
| a* Baseline        | Oral B Gum and enamel (C)          | ZACT Stain fighter (ZW)            | 0.05125               | 0.38226    | 0.894 | -0.7248                 | 0.8273      |
|                    |                                    | Colgate optic volcano mineral (CW) | -0.11750              | 0.38226    | 0.760 | -0.8935                 | 0.6585      |
|                    |                                    | Oral B 3D Fresh breathe (3DW)      | -0.23500              | 0.38226    | 0.543 | -1.0110                 | 0.5410      |
|                    |                                    | Thepthai herbal toothpaste (TW)    | -0.14375              | 0.38226    | 0.709 | -0.9198                 | 0.6323      |
|                    | ZACT Stain fighter (ZW)            | Oral B Gum and enamel (C)          | -0.05125              | 0.38226    | 0.894 | -0.8273                 | 0.7248      |
|                    |                                    | Colgate optic volcano mineral (CW) | -0.16875              | 0.38226    | 0.662 | -0.9448                 | 0.6073      |
|                    |                                    | Oral B 3D Fresh breathe (3DW)      | -0.28625              | 0.38226    | 0.459 | -1.0623                 | 0.4898      |
|                    |                                    | Thepthai herbal toothpaste (TW)    | -0.19500              | 0.38226    | 0.613 | -0.9710                 | 0.5810      |
|                    | Colgate optic volcano mineral (CW) | Oral B Gum and enamel (C)          | 0.11750               | 0.38226    | 0.760 | -0.6585                 | 0.8935      |
|                    |                                    | ZACT Stain fighter (ZW)            | 0.16875               | 0.38226    | 0.662 | -0.6073                 | 0.9448      |
|                    |                                    | Oral B 3D Fresh breathe (3DW)      | -0.11750              | 0.38226    | 0.760 | -0.8935                 | 0.6585      |
|                    |                                    | Thepthai herbal toothpaste (TW)    | -0.02625              | 0.38226    | 0.946 | -0.8023                 | 0.7498      |

|             |                                    |                                    |          |         |       |         |        |
|-------------|------------------------------------|------------------------------------|----------|---------|-------|---------|--------|
|             | Oral B 3D Fresh breathe (3DW)      | Oral B Gum and enamel (C)          | 0.23500  | 0.38226 | 0.543 | -0.5410 | 1.0110 |
|             |                                    | ZACT Stain fighter (ZW)            | 0.28625  | 0.38226 | 0.459 | -0.4898 | 1.0623 |
|             |                                    | Colgate optic volcano mineral (CW) | 0.11750  | 0.38226 | 0.760 | -0.6585 | 0.8935 |
|             |                                    | Thepthai herbal toothpaste(TW)     | 0.09125  | 0.38226 | 0.813 | -0.6848 | 0.8673 |
|             | Thepthai herbal toothpaste(TW)     | Oral B Gum and enamel (C)          | 0.14375  | 0.38226 | 0.709 | -0.6323 | 0.9198 |
|             |                                    | ZACT Stain fighter (ZW)            | 0.19500  | 0.38226 | 0.613 | -0.5810 | 0.9710 |
|             |                                    | Colgate optic volcano mineral (CW) | 0.02625  | 0.38226 | 0.946 | -0.7498 | 0.8023 |
|             |                                    | Oral B 3D Fresh breathe (3DW)      | -0.09125 | 0.38226 | 0.813 | -0.8673 | 0.6848 |
| b* Baseline | Oral B Gum and enamel (C)          | ZACT Stain fighter (ZW)            | -0.27375 | 0.40009 | 0.498 | -1.0860 | 0.5385 |
|             |                                    | Colgate optic volcano mineral (CW) | 0.03250  | 0.40009 | 0.936 | -0.7797 | 0.8447 |
|             |                                    | Oral B 3D Fresh breathe (3DW)      | -0.05750 | 0.40009 | 0.887 | -0.8697 | 0.7547 |
|             |                                    | Thepthai herbal toothpaste (TW)    | -0.42250 | 0.40009 | 0.298 | -1.2347 | 0.3897 |
|             | ZACT Stain fighter (ZW)            | Oral B Gum and enamel (C)          | 0.27375  | 0.40009 | 0.498 | -0.5385 | 1.0860 |
|             |                                    | Colgate optic volcano mineral (CW) | 0.30625  | 0.40009 | 0.449 | -0.5060 | 1.1185 |
|             |                                    | Oral B 3D Fresh breathe (3DW)      | 0.21625  | 0.40009 | 0.592 | -0.5960 | 1.0285 |
|             |                                    | Thepthai herbal toothpaste (TW)    | -0.14875 | 0.40009 | 0.712 | -0.9610 | 0.6635 |
|             | Colgate optic volcano mineral (CW) | Oral B Gum and enamel (C)          | -0.03250 | 0.40009 | 0.936 | -0.8447 | 0.7797 |
|             |                                    | ZACT Stain fighter (ZW)            | -0.30625 | 0.40009 | 0.449 | -1.1185 | 0.5060 |
|             |                                    | Oral B 3D Fresh breathe (3DW)      | -0.09000 | 0.40009 | 0.823 | -0.9022 | 0.7222 |
|             |                                    | Thepthai herbal toothpaste (TW)    | -0.45500 | 0.40009 | 0.263 | -1.2672 | 0.3572 |
|             | Oral B 3D Fresh breathe (3DW)      | Oral B Gum and enamel (C)          | 0.05750  | 0.40009 | 0.887 | -0.7547 | 0.8697 |
|             |                                    | ZACT Stain fighter (ZW)            | -0.21625 | 0.40009 | 0.592 | -1.0285 | 0.5960 |
|             |                                    | Colgate optic volcano mineral (CW) | 0.09000  | 0.40009 | 0.823 | -0.7222 | 0.9022 |
|             |                                    | Thepthai herbal toothpaste (TW)    | -0.36500 | 0.40009 | 0.368 | -1.1772 | 0.4472 |
|             | Thepthai herbal toothpaste(TW)     | Oral B Gum and enamel (C)          | 0.42250  | 0.40009 | 0.298 | -0.3897 | 1.2347 |
|             |                                    | ZACT Stain fighter (ZW)            | 0.14875  | 0.40009 | 0.712 | -0.6635 | 0.9610 |
|             |                                    | Colgate optic volcano mineral (CW) | 0.45500  | 0.40009 | 0.263 | -0.3572 | 1.2672 |
|             |                                    | Oral B 3D Fresh breathe (3DW)      | 0.36500  | 0.40009 | 0.368 | -0.4472 | 1.1772 |

\* The mean difference is significant at the 0.05 level.

**Table S2.** LSD post hoc test showed multiple comparison of surface roughness baseline among fives toothpaste in each time points.

| Dependent Variable | (I) Toothpaste                     | (J) Toothpaste                     | Mean Difference (I-J) | Std. Error | Sig.  | 95% Confidence Interval |             |
|--------------------|------------------------------------|------------------------------------|-----------------------|------------|-------|-------------------------|-------------|
|                    |                                    |                                    |                       |            |       | Lower Bound             | Upper Bound |
| 2week              | Oral B Gum and enamel (C)          | ZACT Stain fighter (ZW)            | -3.68000              | 4.29274    | 0.397 | -12.3947                | 5.0347      |
|                    |                                    | Colgate optic volcano mineral (CW) | 3.53000               | 4.29274    | 0.416 | -5.1847                 | 12.2447     |
|                    |                                    | Oral B 3D Fresh breathe (3DW)      | -1.03750              | 4.29274    | 0.810 | -9.7522                 | 7.6772      |
|                    |                                    | Thepthai herbal toothpaste(TW)     | 0.60625               | 4.29274    | 0.889 | -8.1085                 | 9.3210      |
|                    | ZACT Stain fighter (ZW)            | Oral B Gum and enamel (C)          | 3.68000               | 4.29274    | 0.397 | -5.0347                 | 12.3947     |
|                    |                                    | Colgate optic volcano mineral (CW) | 7.21000               | 4.29274    | 0.102 | -1.5047                 | 15.9247     |
|                    |                                    | Oral B 3D Fresh breathe (3DW)      | 2.64250               | 4.29274    | 0.542 | -6.0722                 | 11.3572     |
|                    |                                    | Thepthai herbal toothpaste(TW)     | 4.28625               | 4.29274    | 0.325 | -4.4285                 | 13.0010     |
|                    | Colgate optic volcano mineral (CW) | Oral B Gum and enamel (C)          | -3.53000              | 4.29274    | 0.416 | -12.2447                | 5.1847      |
|                    |                                    | ZACT Stain fighter (ZW)            | -7.21000              | 4.29274    | 0.102 | -15.9247                | 1.5047      |
|                    |                                    | Oral B 3D Fresh breathe (3DW)      | -4.56750              | 4.29274    | 0.295 | -13.2822                | 4.1472      |
|                    |                                    | Thepthai herbal toothpaste(TW)     | -2.92375              | 4.29274    | 0.500 | -11.6385                | 5.7910      |
|                    | Oral B 3D Fresh breathe (3DW)      | Oral B Gum and enamel (C)          | 1.03750               | 4.29274    | 0.810 | -7.6772                 | 9.7522      |
|                    |                                    | ZACT Stain fighter (ZW)            | -2.64250              | 4.29274    | 0.542 | -11.3572                | 6.0722      |
|                    |                                    | Colgate optic volcano mineral (CW) | 4.56750               | 4.29274    | 0.295 | -4.1472                 | 13.2822     |

|          |                                    |                                    |            |         |       |          |         |
|----------|------------------------------------|------------------------------------|------------|---------|-------|----------|---------|
|          | Thepthai herbal toothpaste(TW)     | Thepthai herbal toothpaste(TW)     | 1.64375    | 4.29274 | 0.704 | -7.0710  | 10.3585 |
|          |                                    | Oral B Gum and enamel (C)          | -0.60625   | 4.29274 | 0.889 | -9.3210  | 8.1085  |
|          |                                    | ZACT Stain fighter (ZW)            | -4.28625   | 4.29274 | 0.325 | -13.0010 | 4.4285  |
|          |                                    | Colgate optic volcano mineral (CW) | 2.92375    | 4.29274 | 0.500 | -5.7910  | 11.6385 |
|          |                                    | Oral B 3D Fresh breathe (3DW)      | -1.64375   | 4.29274 | 0.704 | -10.3585 | 7.0710  |
| 4weeks   | Oral B Gum and enamel (C)          | ZACT Stain fighter (ZW)            | -10.60125* | 4.58953 | 0.027 | -19.9185 | -1.2840 |
|          |                                    | Colgate optic volcano mineral (CW) | 1.68500    | 4.58953 | 0.716 | -7.6322  | 11.0022 |
|          |                                    | Oral B 3D Fresh breathe (3DW)      | -7.72250   | 4.58953 | 0.101 | -17.0397 | 1.5947  |
|          |                                    | Thepthai herbal toothpaste(TW)     | -4.09750   | 4.58953 | 0.378 | -13.4147 | 5.2197  |
|          | ZACT Stain fighter (ZW)            | Oral B Gum and enamel (C)          | 10.60125*  | 4.58953 | 0.027 | 1.2840   | 19.9185 |
|          |                                    | Colgate optic volcano mineral (CW) | 12.28625*  | 4.58953 | 0.011 | 2.9690   | 21.6035 |
|          |                                    | Oral B 3D Fresh breathe (3DW)      | 2.87875    | 4.58953 | 0.535 | -6.4385  | 12.1960 |
|          |                                    | Thepthai herbal toothpaste(TW)     | 6.50375    | 4.58953 | 0.165 | -2.8135  | 15.8210 |
|          | Colgate optic volcano mineral (CW) | Oral B Gum and enamel (C)          | -1.68500   | 4.58953 | 0.716 | -11.0022 | 7.6322  |
|          |                                    | ZACT Stain fighter (ZW)            | -12.28625* | 4.58953 | 0.011 | -21.6035 | -2.9690 |
|          |                                    | Oral B 3D Fresh breathe (3DW)      | -9.40750*  | 4.58953 | 0.048 | -18.7247 | -0.0903 |
|          |                                    | Thepthai herbal toothpaste(TW)     | -5.78250   | 4.58953 | 0.216 | -15.0997 | 3.5347  |
|          | Oral B 3D Fresh breathe (3DW)      | Oral B Gum and enamel (C)          | 7.72250    | 4.58953 | 0.101 | -1.5947  | 17.0397 |
|          |                                    | ZACT Stain fighter (ZW)            | -2.87875   | 4.58953 | 0.535 | -12.1960 | 6.4385  |
|          |                                    | Colgate optic volcano mineral (CW) | 9.40750*   | 4.58953 | 0.048 | 0.0903   | 18.7247 |
|          |                                    | Thepthai herbal toothpaste(TW)     | 3.62500    | 4.58953 | 0.435 | -5.6922  | 12.9422 |
|          | Thepthai herbal toothpaste(TW)     | Oral B Gum and enamel (C)          | 4.09750    | 4.58953 | 0.378 | -5.2197  | 13.4147 |
|          |                                    | ZACT Stain fighter (ZW)            | -6.50375   | 4.58953 | 0.165 | -15.8210 | 2.8135  |
|          |                                    | Colgate optic volcano mineral (CW) | 5.78250    | 4.58953 | 0.216 | -3.5347  | 15.0997 |
|          |                                    | Oral B 3D Fresh breathe (3DW)      | -3.62500   | 4.58953 | 0.435 | -12.9422 | 5.6922  |
| 6 months | Oral B Gum and enamel (C)          | ZACT Stain fighter (ZW)            | -16.75875* | 5.66938 | 0.006 | -28.2682 | -5.2493 |
|          |                                    | Colgate optic volcano mineral (CW) | -1.54250   | 5.66938 | 0.787 | -13.0520 | 9.9670  |
|          |                                    | Oral B 3D Fresh breathe (3DW)      | -14.58500* | 5.66938 | 0.014 | -26.0945 | -3.0755 |
|          |                                    | Thepthai herbal toothpaste(TW)     | -5.66500   | 5.66938 | 0.325 | -17.1745 | 5.8445  |
|          | ZACT Stain fighter (ZW)            | Oral B Gum and enamel (C)          | 16.75875*  | 5.66938 | 0.006 | 5.2493   | 28.2682 |
|          |                                    | Colgate optic volcano mineral (CW) | 15.21625*  | 5.66938 | 0.011 | 3.7068   | 26.7257 |
|          |                                    | Oral B 3D Fresh breathe (3DW)      | 2.17375    | 5.66938 | 0.704 | -9.3357  | 13.6832 |
|          |                                    | Thepthai herbal toothpaste(TW)     | 11.09375   | 5.66938 | 0.058 | -0.4157  | 22.6032 |
|          | Colgate optic volcano mineral (CW) | Oral B Gum and enamel (C)          | 1.54250    | 5.66938 | 0.787 | -9.9670  | 13.0520 |
|          |                                    | ZACT Stain fighter (ZW)            | -15.21625* | 5.66938 | 0.011 | -26.7257 | -3.7068 |
|          |                                    | Oral B 3D Fresh breathe (3DW)      | -13.04250* | 5.66938 | 0.027 | -24.5520 | -1.5330 |
|          |                                    | Thepthai herbal toothpaste(TW)     | -4.12250   | 5.66938 | 0.472 | -15.6320 | 7.3870  |
|          | Oral B 3D Fresh breathe (3DW)      | Oral B Gum and enamel (C)          | 14.58500*  | 5.66938 | 0.014 | 3.0755   | 26.0945 |
|          |                                    | ZACT Stain fighter (ZW)            | -2.17375   | 5.66938 | 0.704 | -13.6832 | 9.3357  |
|          |                                    | Colgate optic volcano mineral (CW) | 13.04250*  | 5.66938 | 0.027 | 1.5330   | 24.5520 |
|          |                                    | Thepthai herbal toothpaste(TW)     | 8.92000    | 5.66938 | 0.125 | -2.5895  | 20.4295 |

|           |                                    |                                    |            |         |       |          |          |
|-----------|------------------------------------|------------------------------------|------------|---------|-------|----------|----------|
|           | Thepthai herbal toothpaste(TW)     | Oral B Gum and enamel (C)          | 5.66500    | 5.66938 | 0.325 | -5.8445  | 17.1745  |
|           |                                    | ZACT Stain fighter (ZW)            | -11.09375  | 5.66938 | 0.058 | -22.6032 | 0.4157   |
|           |                                    | Colgate optic volcano mineral (CW) | 4.12250    | 5.66938 | 0.472 | -7.3870  | 15.6320  |
|           |                                    | Oral B 3D Fresh breathe (3DW)      | -8.92000   | 5.66938 | 0.125 | -20.4295 | 2.5895   |
| 12 months | Oral B Gum and enamel (C)          | ZACT Stain fighter (ZW)            | -14.09875* | 3.70849 | 0.001 | -21.6274 | -6.5701  |
|           |                                    | Colgate optic volcano mineral (CW) | 7.02125    | 3.70849 | 0.067 | -0.5074  | 14.5499  |
|           |                                    | Oral B 3D Fresh breathe (3DW)      | -11.98625* | 3.70849 | 0.003 | -19.5149 | -4.4576  |
|           |                                    | Thepthai herbal toothpaste(TW)     | 1.41750    | 3.70849 | 0.705 | -6.1111  | 8.9461   |
|           | ZACT Stain fighter (ZW)            | Oral B Gum and enamel (C)          | 14.09875*  | 3.70849 | 0.001 | 6.5701   | 21.6274  |
|           |                                    | Colgate optic volcano mineral (CW) | 21.12000*  | 3.70849 | 0.000 | 13.5914  | 28.6486  |
|           |                                    | Oral B 3D Fresh breathe (3DW)      | 2.11250    | 3.70849 | 0.573 | -5.4161  | 9.6411   |
|           |                                    | Thepthai herbal toothpaste(TW)     | 15.51625*  | 3.70849 | 0.000 | 7.9876   | 23.0449  |
|           | Colgate optic volcano mineral (CW) | Oral B Gum and enamel (C)          | -7.02125   | 3.70849 | 0.067 | -14.5499 | 0.5074   |
|           |                                    | ZACT Stain fighter (ZW)            | -21.12000* | 3.70849 | 0.000 | -28.6486 | -13.5914 |
|           |                                    | Oral B 3D Fresh breathe (3DW)      | -19.00750* | 3.70849 | 0.000 | -26.5361 | -11.4789 |
|           |                                    | Thepthai herbal toothpaste(TW)     | -5.60375   | 3.70849 | 0.140 | -13.1324 | 1.9249   |
|           | Oral B 3D Fresh breathe (3DW)      | Oral B Gum and enamel (C)          | 11.98625*  | 3.70849 | 0.003 | 4.4576   | 19.5149  |
|           |                                    | ZACT Stain fighter (ZW)            | -2.11250   | 3.70849 | 0.573 | -9.6411  | 5.4161   |
|           |                                    | Colgate optic volcano mineral (CW) | 19.00750*  | 3.70849 | 0.000 | 11.4789  | 26.5361  |
|           |                                    | Thepthai herbal toothpaste(TW)     | 13.40375*  | 3.70849 | 0.001 | 5.8751   | 20.9324  |
|           | Thepthai herbal toothpaste(TW)     | Oral B Gum and enamel (C)          | -1.41750   | 3.70849 | 0.705 | -8.9461  | 6.1111   |
|           |                                    | ZACT Stain fighter (ZW)            | -15.51625* | 3.70849 | 0.000 | -23.0449 | -7.9876  |
|           |                                    | Colgate optic volcano mineral (CW) | 5.60375    | 3.70849 | 0.140 | -1.9249  | 13.1324  |
|           |                                    | Oral B 3D Fresh breathe (3DW)      | -13.40375* | 3.70849 | 0.001 | -20.9324 | -5.8751  |

\*. The mean difference is significant at the 0.05 level.

**Table S3.** Dunn's post hoc test showed multiple comparison of surface roughness among time points of each toothpaste.

| Toothpastes               | Time points          | Test Statistic | Std. Error | Std. Test Statistic | Sig.  |
|---------------------------|----------------------|----------------|------------|---------------------|-------|
| Oral-B gum and enamel (C) | Baseline - 2 weeks   | -0.375         | 0.791      | -0.474              | 0.635 |
|                           | Baseline - 4 weeks   | -1.375         | 0.791      | -1.739              | 0.082 |
|                           | Baseline - 6 months  | -2.500         | 0.791      | -3.162              | 0.002 |
|                           | Baseline - 12 months | -3.250         | 0.791      | -4.111              | 0.000 |
|                           | 2 weeks - 4 weeks    | -1.000         | 0.791      | -1.265              | 0.206 |
|                           | 2 weeks - 6 months   | -2.125         | 0.791      | -2.688              | 0.007 |
|                           | 2 weeks - 12 months  | -2.875         | 0.791      | -3.637              | 0.000 |
|                           | 4 weeks - 6 months   | -1.125         | 0.791      | -1.423              | 0.155 |
|                           | 4 weeks - 12 months  | -1.875         | 0.791      | -2.372              | 0.018 |
|                           | 6 months - 12 months | -0.750         | 0.791      | -0.949              | 0.343 |
| ZACT Staing fighter (ZW)  | Baseline - 2 weeks   | -1.000         | 0.791      | -1.265              | 0.206 |
|                           | Baseline - 4 weeks   | -2.000         | 0.791      | -2.530              | 0.011 |

|                                     |                      |        |       |        |       |
|-------------------------------------|----------------------|--------|-------|--------|-------|
|                                     | Baseline - 6 months  | -3.000 | 0.791 | -3.795 | 0.000 |
|                                     | Baseline - 12 months | -4.000 | 0.791 | -5.060 | 0.000 |
|                                     | 2 weeks - 4 weeks    | -1.000 | 0.791 | -1.265 | 0.206 |
|                                     | 2 weeks - 6 months   | -2.000 | 0.791 | -2.530 | 0.011 |
|                                     | 2 weeks - 12 months  | -3.000 | 0.791 | -3.795 | 0.000 |
|                                     | 4 weeks - 6 months   | -1.000 | 0.791 | -1.265 | 0.206 |
|                                     | 4 weeks - 12 months  | -2.000 | 0.791 | -2.530 | 0.011 |
|                                     | 6 months - 12 months | -1.000 | 0.791 | -1.265 | 0.206 |
| Colgate optic volcanic mineral (CW) | Baseline - 2 weeks   | -0.125 | 0.791 | -0.158 | 0.874 |
|                                     | Baseline - 4 weeks   | -0.875 | 0.791 | -1.107 | 0.268 |
|                                     | Baseline - 6 months  | -2.125 | 0.791 | -2.688 | 0.007 |
|                                     | Baseline - 12 months | -3.125 | 0.791 | -3.953 | 0.000 |
|                                     | 2 weeks - 4 weeks    | -0.750 | 0.791 | -0.949 | 0.343 |
|                                     | 2 weeks - 6 months   | -2.000 | 0.791 | -2.530 | 0.011 |
|                                     | 2 weeks - 12 months  | -3.000 | 0.791 | -3.795 | 0.000 |
|                                     | 4 weeks - 6 months   | -1.250 | 0.791 | -1.581 | 0.114 |
|                                     | 4 weeks - 12 months  | -2.250 | 0.791 | -2.846 | 0.004 |
|                                     | 6 months - 12 months | -1.000 | 0.791 | -1.265 | 0.206 |
| Oral B 3D Fresh breath              | Baseline - 2 weeks   | -0.750 | 0.791 | -0.949 | 0.343 |
|                                     | Baseline - 4 weeks   | -1.875 | 0.791 | -2.372 | 0.018 |
|                                     | Baseline - 6 months  | -3.250 | 0.791 | -4.111 | 0.000 |
|                                     | Baseline - 12 months | -3.500 | 0.791 | -4.427 | 0.000 |
|                                     | 2 weeks - 4 weeks    | -1.125 | 0.791 | -1.423 | 0.155 |
|                                     | 2 weeks - 6 months   | -2.500 | 0.791 | -3.162 | 0.002 |
|                                     | 2 weeks - 12 months  | -2.750 | 0.791 | -3.479 | 0.001 |
|                                     | 4 weeks - 6 months   | -1.375 | 0.791 | -1.739 | 0.082 |
|                                     | 4 weeks - 12 months  | -1.625 | 0.791 | -2.055 | 0.040 |
|                                     | 6 months - 12 months | -0.250 | 0.791 | -0.316 | 0.752 |
| Thepthai (TW)                       | Baseline - 2 weeks   | -0.125 | 0.791 | -0.158 | 0.874 |
|                                     | Baseline - 4 weeks   | -1.063 | 0.791 | -1.344 | 0.179 |
|                                     | Baseline - 6 months  | -2.313 | 0.791 | -2.925 | 0.003 |
|                                     | Baseline - 12 months | -3.375 | 0.791 | -4.269 | 0.000 |
|                                     | 2 weeks - 4 weeks    | -0.938 | 0.791 | -1.186 | 0.236 |
|                                     | 2 weeks - 6 months   | -2.188 | 0.791 | -2.767 | 0.006 |
|                                     | 2 weeks - 12 months  | -3.250 | 0.791 | -4.111 | 0.000 |
|                                     | 4 weeks - 6 months   | -1.250 | 0.791 | -1.581 | 0.114 |
|                                     | 4 weeks - 12 months  | -2.313 | 0.791 | -2.925 | 0.003 |
|                                     | 6 months - 12 months | -1.063 | 0.791 | -1.344 | 0.179 |

**Table S4.** LSD post hoc test showed multiple comparison of  $\Delta L$  among fives toothpaste in each time points.

| Dependent Variable | (I) Toothpaste                     | (J) Toothpaste                     | Mean Difference (I-J) | Std. Error | Sig.  | 95% Confidence Interval |             |
|--------------------|------------------------------------|------------------------------------|-----------------------|------------|-------|-------------------------|-------------|
|                    |                                    |                                    |                       |            |       | Lower Bound             | Upper Bound |
| 2 weeks            | Oral B Gum and enamel (C)          | ZACT Stain fighter (ZW)            | -3.68000              | 4.29274    | 0.397 | -12.3947                | 5.0347      |
|                    |                                    | Colgate optic volcano mineral (CW) | 3.53000               | 4.29274    | 0.416 | -5.1847                 | 12.2447     |
|                    |                                    | Oral B 3D Fresh breathe (3DW)      | -1.03750              | 4.29274    | 0.810 | -9.7522                 | 7.6772      |
|                    |                                    | Thepthai herbal toothpaste(TW)     | 0.60625               | 4.29274    | 0.889 | -8.1085                 | 9.3210      |
|                    | ZACT Stain fighter (ZW)            | Oral B Gum and enamel (C)          | 3.68000               | 4.29274    | 0.397 | -5.0347                 | 12.3947     |
|                    |                                    | Colgate optic volcano mineral (CW) | 7.21000               | 4.29274    | 0.102 | -1.5047                 | 15.9247     |
|                    |                                    | Oral B 3D Fresh breathe (3DW)      | 2.64250               | 4.29274    | 0.542 | -6.0722                 | 11.3572     |
|                    |                                    | Thepthai herbal toothpaste(TW)     | 4.28625               | 4.29274    | 0.325 | -4.4285                 | 13.0010     |
|                    | Colgate optic volcano mineral (CW) | Oral B Gum and enamel (C)          | -3.53000              | 4.29274    | 0.416 | -12.2447                | 5.1847      |
|                    |                                    | ZACT Stain fighter (ZW)            | -7.21000              | 4.29274    | 0.102 | -15.9247                | 1.5047      |
|                    |                                    | Oral B 3D Fresh breathe (3DW)      | -4.56750              | 4.29274    | 0.295 | -13.2822                | 4.1472      |
|                    |                                    | Thepthai herbal toothpaste(TW)     | -2.92375              | 4.29274    | 0.500 | -11.6385                | 5.7910      |
|                    | Oral B 3D Fresh breathe (3DW)      | Oral B Gum and enamel (C)          | 1.03750               | 4.29274    | 0.810 | -7.6772                 | 9.7522      |
|                    |                                    | ZACT Stain fighter (ZW)            | -2.64250              | 4.29274    | 0.542 | -11.3572                | 6.0722      |
|                    |                                    | Colgate optic volcano mineral (CW) | 4.56750               | 4.29274    | 0.295 | -4.1472                 | 13.2822     |
|                    |                                    | Thepthai herbal toothpaste(TW)     | 1.64375               | 4.29274    | 0.704 | -7.0710                 | 10.3585     |
|                    | Thepthai herbal toothpaste(TW)     | Oral B Gum and enamel (C)          | -0.60625              | 4.29274    | 0.889 | -9.3210                 | 8.1085      |
|                    |                                    | ZACT Stain fighter (ZW)            | -4.28625              | 4.29274    | 0.325 | -13.0010                | 4.4285      |
|                    |                                    | Colgate optic volcano mineral (CW) | 2.92375               | 4.29274    | 0.500 | -5.7910                 | 11.6385     |
|                    |                                    | Oral B 3D Fresh breathe (3DW)      | -1.64375              | 4.29274    | 0.704 | -10.3585                | 7.0710      |
| 4 weeks            | Oral B Gum and enamel (C)          | ZACT Stain fighter (ZW)            | -10.60125*            | 4.58953    | 0.027 | -19.9185                | -1.2840     |
|                    |                                    | Colgate optic volcano mineral (CW) | 1.68500               | 4.58953    | 0.716 | -7.6322                 | 11.0022     |
|                    |                                    | Oral B 3D Fresh breathe (3DW)      | -7.72250              | 4.58953    | 0.101 | -17.0397                | 1.5947      |
|                    |                                    | Thepthai herbal toothpaste(TW)     | -4.09750              | 4.58953    | 0.378 | -13.4147                | 5.2197      |
|                    | ZACT Stain fighter (ZW)            | Oral B Gum and enamel (C)          | 10.60125*             | 4.58953    | 0.027 | 1.2840                  | 19.9185     |
|                    |                                    | Colgate optic volcano mineral (CW) | 12.28625*             | 4.58953    | 0.011 | 2.9690                  | 21.6035     |
|                    |                                    | Oral B 3D Fresh breathe (3DW)      | 2.87875               | 4.58953    | 0.535 | -6.4385                 | 12.1960     |
|                    |                                    | Thepthai herbal toothpaste(TW)     | 6.50375               | 4.58953    | 0.165 | -2.8135                 | 15.8210     |
|                    | Colgate optic volcano mineral (CW) | Oral B Gum and enamel (C)          | -1.68500              | 4.58953    | 0.716 | -11.0022                | 7.6322      |
|                    |                                    | ZACT Stain fighter (ZW)            | -12.28625*            | 4.58953    | 0.011 | -21.6035                | -2.9690     |
|                    |                                    | Oral B 3D Fresh breathe (3DW)      | -9.40750*             | 4.58953    | 0.048 | -18.7247                | -0.0903     |
|                    |                                    | Thepthai herbal toothpaste(TW)     | -5.78250              | 4.58953    | 0.216 | -15.0997                | 3.5347      |
|                    | Oral B 3D Fresh breathe (3DW)      | Oral B Gum and enamel (C)          | 7.72250               | 4.58953    | 0.101 | -1.5947                 | 17.0397     |
|                    |                                    | ZACT Stain fighter (ZW)            | -2.87875              | 4.58953    | 0.535 | -12.1960                | 6.4385      |
|                    |                                    | Colgate optic volcano mineral (CW) | 9.40750*              | 4.58953    | 0.048 | 0.0903                  | 18.7247     |
|                    |                                    | Thepthai herbal toothpaste(TW)     | 3.62500               | 4.58953    | 0.435 | -5.6922                 | 12.9422     |
|                    | Thepthai herbal toothpaste(TW)     | Oral B Gum and enamel (C)          | 4.09750               | 4.58953    | 0.378 | -5.2197                 | 13.4147     |
|                    |                                    | ZACT Stain fighter (ZW)            | -6.50375              | 4.58953    | 0.165 | -15.8210                | 2.8135      |
|                    |                                    | Colgate optic volcano mineral (CW) | 5.78250               | 4.58953    | 0.216 | -3.5347                 | 15.0997     |
|                    |                                    | Oral B 3D Fresh breathe (3DW)      | -3.62500              | 4.58953    | 0.435 | -12.9422                | 5.6922      |
| 6 months           | Oral B Gum and enamel (C)          | ZACT Stain fighter (ZW)            | -16.75875*            | 5.66938    | 0.006 | -28.2682                | -5.2493     |
|                    |                                    | Colgate optic volcano mineral (CW) | -1.54250              | 5.66938    | 0.787 | -13.0520                | 9.9670      |
|                    |                                    | Oral B 3D Fresh breathe (3DW)      | -14.58500*            | 5.66938    | 0.014 | -26.0945                | -3.0755     |
|                    |                                    | Thepthai herbal toothpaste(TW)     | -5.66500              | 5.66938    | 0.325 | -17.1745                | 5.8445      |
|                    | ZACT Stain fighter (ZW)            | Oral B Gum and enamel (C)          | 16.75875*             | 5.66938    | 0.006 | 5.2493                  | 28.2682     |
|                    |                                    | Colgate optic volcano mineral (CW) | 15.21625*             | 5.66938    | 0.011 | 3.7068                  | 26.7257     |
|                    |                                    | Oral B 3D Fresh breathe (3DW)      | 2.17375               | 5.66938    | 0.704 | -9.3357                 | 13.6832     |
|                    |                                    | Thepthai herbal toothpaste(TW)     | 11.09375              | 5.66938    | 0.058 | -0.4157                 | 22.6032     |
|                    | Colgate optic volcano mineral (CW) | Oral B Gum and enamel (C)          | 1.54250               | 5.66938    | 0.787 | -9.9670                 | 13.0520     |
|                    |                                    | ZACT Stain fighter (ZW)            | -15.21625*            | 5.66938    | 0.011 | -26.7257                | -3.7068     |
|                    |                                    | Oral B 3D Fresh breathe (3DW)      | -13.04250*            | 5.66938    | 0.027 | -24.5520                | -1.5330     |

|           |                                    |                                    |            |         |       |          |          |
|-----------|------------------------------------|------------------------------------|------------|---------|-------|----------|----------|
| 12 months | Oral B 3D Fresh breathe (3DW)      | Thepthai herbal toothpaste(TW)     | -4.12250   | 5.66938 | 0.472 | -15.6320 | 7.3870   |
|           |                                    | Oral B Gum and enamel (C)          | 14.58500*  | 5.66938 | 0.014 | 3.0755   | 26.0945  |
|           |                                    | ZACT Stain fighter (ZW)            | -2.17375   | 5.66938 | 0.704 | -13.6832 | 9.3357   |
|           |                                    | Colgate optic volcano mineral (CW) | 13.04250*  | 5.66938 | 0.027 | 1.5330   | 24.5520  |
|           | Thepthai herbal toothpaste(TW)     | Thepthai herbal toothpaste(TW)     | 8.92000    | 5.66938 | 0.125 | -2.5895  | 20.4295  |
|           |                                    | Oral B Gum and enamel (C)          | 5.66500    | 5.66938 | 0.325 | -5.8445  | 17.1745  |
|           |                                    | ZACT Stain fighter (ZW)            | -11.09375  | 5.66938 | 0.058 | -22.6032 | 0.4157   |
|           |                                    | Colgate optic volcano mineral (CW) | 4.12250    | 5.66938 | 0.472 | -7.3870  | 15.6320  |
|           | Oral B Gum and enamel (C)          | Oral B 3D Fresh breathe (3DW)      | -8.92000   | 5.66938 | 0.125 | -20.4295 | 2.5895   |
|           |                                    | ZACT Stain fighter (ZW)            | -14.09875* | 3.70849 | 0.001 | -21.6274 | -6.5701  |
|           |                                    | Colgate optic volcano mineral (CW) | 7.02125    | 3.70849 | 0.067 | -0.5074  | 14.5499  |
|           |                                    | Oral B 3D Fresh breathe (3DW)      | -11.98625* | 3.70849 | 0.003 | -19.5149 | -4.4576  |
|           | ZACT Stain fighter (ZW)            | Thepthai herbal toothpaste(TW)     | 1.41750    | 3.70849 | 0.705 | -6.1111  | 8.9461   |
|           |                                    | Oral B Gum and enamel (C)          | 14.09875*  | 3.70849 | 0.001 | 6.5701   | 21.6274  |
|           |                                    | Colgate optic volcano mineral (CW) | 21.12000*  | 3.70849 | 0.000 | 13.5914  | 28.6486  |
|           |                                    | Oral B 3D Fresh breathe (3DW)      | 2.11250    | 3.70849 | 0.573 | -5.4161  | 9.6411   |
|           | Colgate optic volcano mineral (CW) | Thepthai herbal toothpaste(TW)     | 15.51625*  | 3.70849 | 0.000 | 7.9876   | 23.0449  |
|           |                                    | Oral B Gum and enamel (C)          | -7.02125   | 3.70849 | 0.067 | -14.5499 | 0.5074   |
|           |                                    | ZACT Stain fighter (ZW)            | -21.12000* | 3.70849 | 0.000 | -28.6486 | -13.5914 |
|           |                                    | Oral B 3D Fresh breathe (3DW)      | -19.00750* | 3.70849 | 0.000 | -26.5361 | -11.4789 |
|           | Oral B 3D Fresh breathe (3DW)      | Thepthai herbal toothpaste(TW)     | -5.60375   | 3.70849 | 0.140 | -13.1324 | 1.9249   |
|           |                                    | Oral B Gum and enamel (C)          | 11.98625*  | 3.70849 | 0.003 | 4.4576   | 19.5149  |
|           |                                    | ZACT Stain fighter (ZW)            | -2.11250   | 3.70849 | 0.573 | -9.6411  | 5.4161   |
|           |                                    | Colgate optic volcano mineral (CW) | 19.00750*  | 3.70849 | 0.000 | 11.4789  | 26.5361  |
|           | Thepthai herbal toothpaste(TW)     | Thepthai herbal toothpaste(TW)     | 13.40375*  | 3.70849 | 0.001 | 5.8751   | 20.9324  |
|           |                                    | Oral B Gum and enamel (C)          | -1.41750   | 3.70849 | 0.705 | -8.9461  | 6.1111   |
|           |                                    | ZACT Stain fighter (ZW)            | -15.51625* | 3.70849 | 0.000 | -23.0449 | -7.9876  |
|           |                                    | Colgate optic volcano mineral (CW) | 5.60375    | 3.70849 | 0.140 | -1.9249  | 13.1324  |
|           | Oral B 3D Fresh breathe (3DW)      | Oral B 3D Fresh breathe (3DW)      | -13.40375* | 3.70849 | 0.001 | -20.9324 | -5.8751  |

\* The mean difference is significant at the 0.05 level.

**Table S5.** Dunn's post hoc test showed multiple comparison of  $\Delta L$  among time points of each toothpaste.

| Toothpastes                         | Time points          | Test Statistic | Std. Error | Std. Test Statistic | Sig.  |
|-------------------------------------|----------------------|----------------|------------|---------------------|-------|
| Oral-B gum and enamel (C)           | 2 weeks - 4 weeks    | -0.500         | 0.645      | -0.775              | 0.439 |
|                                     | 2 weeks - 6 months   | -0.500         | 0.645      | -0.775              | 0.439 |
|                                     | 2 weeks - 12 months  | -2.000         | 0.645      | -3.098              | 0.002 |
|                                     | 4 weeks - 6 months   | 0.000          | 0.645      | 0.000               | 1.000 |
|                                     | 4 weeks - 12 months  | -1.500         | 0.645      | -2.324              | 0.020 |
|                                     | 6 months - 12 months | -1.500         | 0.645      | -2.324              | 0.020 |
| ZACT Staing fighter (ZW)            | 2 weeks - 4 weeks    | -0.750         | 0.645      | -1.162              | 0.245 |
|                                     | 2 weeks - 6 months   | -1.875         | 0.645      | -2.905              | 0.004 |
|                                     | 2 weeks - 12 months  | -2.875         | 0.645      | -4.454              | 0.000 |
|                                     | 4 weeks - 6 months   | -1.125         | 0.645      | -1.743              | 0.081 |
|                                     | 4 weeks - 12 months  | -2.125         | 0.645      | -3.292              | 0.001 |
|                                     | 6 months - 12 months | -1.000         | 0.645      | -1.549              | 0.121 |
| Colgate optic volcanic mineral (CW) | 2 weeks - 4 weeks    | -0.250         | 0.645      | -0.387              | 0.699 |
|                                     | 2 weeks - 6 months   | -1.125         | 0.645      | -1.743              | 0.081 |
|                                     | 2 weeks - 12 months  | -1.625         | 0.645      | -2.517              | 0.012 |

|                              |                      |        |       |        |       |
|------------------------------|----------------------|--------|-------|--------|-------|
| Oral B 3D Fresh breath (3DW) | 4 weeks - 6 months   | -0.875 | 0.645 | -1.356 | 0.175 |
|                              | 4 weeks - 12 months  | -1.375 | 0.645 | -2.130 | 0.033 |
|                              | 6 months - 12 months | -0.500 | 0.645 | -0.775 | 0.439 |
|                              | 2 weeks - 4 weeks    | -1.000 | 0.645 | -1.549 | 0.121 |
|                              | 2 weeks - 6 months   | -2.125 | 0.645 | -3.292 | 0.001 |
|                              | 2 weeks - 12 months  | -2.875 | 0.645 | -4.454 | 0.000 |
|                              | 4 weeks - 6 months   | -1.125 | 0.645 | -1.743 | 0.081 |
|                              | 4 weeks - 12 months  | -1.875 | 0.645 | -2.905 | 0.004 |
|                              | 6 months - 12 months | -0.750 | 0.645 | -1.162 | 0.245 |
| Thepthai (TW)                | 2 weeks - 6 months   | -0.375 | 0.645 | -0.581 | 0.561 |
|                              | 2 weeks - 4 weeks    | -0.500 | 0.645 | -0.775 | 0.439 |
|                              | 2 weeks - 12 months  | -2.125 | 0.645 | -3.292 | 0.001 |
|                              | 6 months - 4 weeks   | 0.125  | 0.645 | 0.194  | 0.846 |
|                              | 6 months - 12 months | -1.750 | 0.645 | -2.711 | 0.007 |
|                              | 4 weeks - 12 months  | -1.625 | 0.645 | -2.517 | 0.012 |

**Table S6.** LSD post hoc test showed multiple comparison of  $\Delta E_{00}$  baseline among fives toothpaste in each time points.

| Dependent Variable | (I) Toothpaste                     | (J) Toothpaste                     | Mean Difference (I-J) | Std. Error | Sig.  | 95% Confidence Interval |             |
|--------------------|------------------------------------|------------------------------------|-----------------------|------------|-------|-------------------------|-------------|
|                    |                                    |                                    |                       |            |       | Lower Bound             | Upper Bound |
| 2 weeks            | Oral B Gum and enamel (C)          | ZACT Stain fighter (ZW)            | -4.28067              | 3.92897    | 0.283 | -12.2569                | 3.6956      |
|                    |                                    | Colgate optic volcano mineral (CW) | 2.76525               | 3.92897    | 0.486 | -5.2110                 | 10.7415     |
|                    |                                    | Oral B 3D Fresh breathe (3DW)      | -1.88778              | 3.92897    | 0.634 | -9.8640                 | 6.0884      |
|                    |                                    | Thepthai herbal toothpaste(TW)     | 0.32772               | 3.92897    | 0.934 | -7.6485                 | 8.3039      |
|                    | ZACT Stain fighter (ZW)            | Oral B Gum and enamel (C)          | 4.28067               | 3.92897    | 0.283 | -3.6956                 | 12.2569     |
|                    |                                    | Colgate optic volcano mineral (CW) | 7.04592               | 3.92897    | 0.082 | -0.9303                 | 15.0221     |
|                    |                                    | Oral B 3D Fresh breathe (3DW)      | 2.39289               | 3.92897    | 0.546 | -5.5833                 | 10.3691     |
|                    |                                    | Thepthai herbal toothpaste(TW)     | 4.60839               | 3.92897    | 0.249 | -3.3678                 | 12.5846     |
|                    | Colgate optic volcano mineral (CW) | Oral B Gum and enamel (C)          | -2.76525              | 3.92897    | 0.486 | -10.7415                | 5.2110      |
|                    |                                    | ZACT Stain fighter (ZW)            | -7.04592              | 3.92897    | 0.082 | -15.0221                | 0.9303      |
|                    |                                    | Oral B 3D Fresh breathe (3DW)      | -4.65303              | 3.92897    | 0.244 | -12.6293                | 3.3232      |
|                    |                                    | Thepthai herbal toothpaste(TW)     | -2.43753              | 3.92897    | 0.539 | -10.4138                | 5.5387      |
|                    | Oral B 3D Fresh breathe (3DW)      | Oral B Gum and enamel (C)          | 1.88778               | 3.92897    | 0.634 | -6.0884                 | 9.8640      |
|                    |                                    | ZACT Stain fighter (ZW)            | -2.39289              | 3.92897    | 0.546 | -10.3691                | 5.5833      |
|                    |                                    | Colgate optic volcano mineral (CW) | 4.65303               | 3.92897    | 0.244 | -3.3232                 | 12.6293     |
|                    |                                    | Thepthai herbal toothpaste(TW)     | 2.21550               | 3.92897    | 0.576 | -5.7607                 | 10.1917     |
|                    | Thepthai herbal toothpaste(TW)     | Oral B Gum and enamel (C)          | -0.32772              | 3.92897    | 0.934 | -8.3039                 | 7.6485      |
|                    |                                    | ZACT Stain fighter (ZW)            | -4.60839              | 3.92897    | 0.249 | -12.5846                | 3.3678      |
|                    |                                    | Colgate optic volcano mineral (CW) | 2.43753               | 3.92897    | 0.539 | -5.5387                 | 10.4138     |
|                    |                                    | Oral B 3D Fresh breathe (3DW)      | -2.21550              | 3.92897    | 0.576 | -10.1917                | 5.7607      |
| 4 weeks            | Oral B Gum and enamel (C)          | ZACT Stain fighter (ZW)            | -11.23073*            | 3.66737    | 0.004 | -18.6759                | -3.7856     |
|                    |                                    | Colgate optic volcano mineral (CW) | 1.89672               | 3.66737    | 0.608 | -5.5484                 | 9.3419      |
|                    |                                    | Oral B 3D Fresh breathe (3DW)      | -10.28617*            | 3.66737    | 0.008 | -17.7313                | -2.8410     |
|                    |                                    | Thepthai herbal toothpaste(TW)     | 0.17268               | 3.66737    | 0.963 | -7.2725                 | 7.6178      |
|                    | ZACT Stain fighter (ZW)            | Oral B Gum and enamel (C)          | 11.23073*             | 3.66737    | 0.004 | 3.7856                  | 18.6759     |
|                    |                                    | Colgate optic volcano mineral (CW) | 13.12744*             | 3.66737    | 0.001 | 5.6823                  | 20.5726     |
|                    |                                    | Oral B 3D Fresh breathe (3DW)      | 0.94456               | 3.66737    | 0.798 | -6.5006                 | 8.3897      |
|                    |                                    | Thepthai herbal toothpaste(TW)     | 11.40341*             | 3.66737    | 0.004 | 3.9583                  | 18.8486     |
|                    |                                    | Oral B Gum and enamel (C)          | -1.89672              | 3.66737    | 0.608 | -9.3419                 | 5.5484      |
|                    |                                    |                                    |                       |            |       |                         |             |

|           |                                    |                                    |            |         |       |          |          |
|-----------|------------------------------------|------------------------------------|------------|---------|-------|----------|----------|
|           | Colgate optic volcano mineral (CW) | ZACT Stain fighter (ZW)            | -13.12744* | 3.66737 | 0.001 | -20.5726 | -5.6823  |
|           |                                    | Oral B 3D Fresh breathe (3DW)      | -12.18288* | 3.66737 | 0.002 | -19.6280 | -4.7377  |
|           |                                    | Thepthai herbal toothpaste(TW)     | -1.72403   | 3.66737 | 0.641 | -9.1692  | 5.7211   |
|           | Oral B 3D Fresh breathe (3DW)      | Oral B Gum and enamel (C)          | 10.28617*  | 3.66737 | 0.008 | 2.8410   | 17.7313  |
|           |                                    | ZACT Stain fighter (ZW)            | -0.94456   | 3.66737 | 0.798 | -8.3897  | 6.5006   |
|           |                                    | Colgate optic volcano mineral (CW) | 12.18288*  | 3.66737 | 0.002 | 4.7377   | 19.6280  |
|           | Thepthai herbal toothpaste(TW)     | Thepthai herbal toothpaste(TW)     | 10.45885*  | 3.66737 | 0.007 | 3.0137   | 17.9040  |
|           |                                    | Oral B Gum and enamel (C)          | -0.17268   | 3.66737 | 0.963 | -7.6178  | 7.2725   |
|           |                                    | ZACT Stain fighter (ZW)            | -11.40341* | 3.66737 | 0.004 | -18.8486 | -3.9583  |
|           |                                    | Colgate optic volcano mineral (CW) | 1.72403    | 3.66737 | 0.641 | -5.7211  | 9.1692   |
|           |                                    | Oral B 3D Fresh breathe (3DW)      | -10.45885* | 3.66737 | 0.007 | -17.9040 | -3.0137  |
| 6 months  | Oral B Gum and enamel (C)          | ZACT Stain fighter (ZW)            | -18.79640* | 4.62302 | 0.000 | -28.1816 | -9.4112  |
|           |                                    | Colgate optic volcano mineral (CW) | -1.48728   | 4.62302 | 0.750 | -10.8725 | 7.8980   |
|           |                                    | Oral B 3D Fresh breathe (3DW)      | -17.15408* | 4.62302 | 0.001 | -26.5393 | -7.7688  |
|           |                                    | Thepthai herbal toothpaste(TW)     | -2.38810   | 4.62302 | 0.609 | -11.7733 | 6.9971   |
|           | ZACT Stain fighter (ZW)            | Oral B Gum and enamel (C)          | 18.79640*  | 4.62302 | 0.000 | 9.4112   | 28.1816  |
|           |                                    | Colgate optic volcano mineral (CW) | 17.30911*  | 4.62302 | 0.001 | 7.9239   | 26.6943  |
|           |                                    | Oral B 3D Fresh breathe (3DW)      | 1.64231    | 4.62302 | 0.725 | -7.7429  | 11.0275  |
|           |                                    | Thepthai herbal toothpaste(TW)     | 16.40829*  | 4.62302 | 0.001 | 7.0231   | 25.7935  |
|           | Colgate optic volcano mineral (CW) | Oral B Gum and enamel (C)          | 1.48728    | 4.62302 | 0.750 | -7.8980  | 10.8725  |
|           |                                    | ZACT Stain fighter (ZW)            | -17.30911* | 4.62302 | 0.001 | -26.6943 | -7.9239  |
|           |                                    | Oral B 3D Fresh breathe (3DW)      | -15.66680* | 4.62302 | 0.002 | -25.0520 | -6.2816  |
|           |                                    | Thepthai herbal toothpaste(TW)     | -0.90082   | 4.62302 | 0.847 | -10.2861 | 8.4844   |
|           | Oral B 3D Fresh breathe (3DW)      | Oral B Gum and enamel (C)          | 17.15408*  | 4.62302 | 0.001 | 7.7688   | 26.5393  |
|           |                                    | ZACT Stain fighter (ZW)            | -1.64231   | 4.62302 | 0.725 | -11.0275 | 7.7429   |
|           |                                    | Colgate optic volcano mineral (CW) | 15.66680*  | 4.62302 | 0.002 | 6.2816   | 25.0520  |
|           |                                    | Thepthai herbal toothpaste(TW)     | 14.76598*  | 4.62302 | 0.003 | 5.3807   | 24.1512  |
|           | Thepthai herbal toothpaste(TW)     | Oral B Gum and enamel (C)          | 2.38810    | 4.62302 | 0.609 | -6.9971  | 11.7733  |
|           |                                    | ZACT Stain fighter (ZW)            | -16.40829* | 4.62302 | 0.001 | -25.7935 | -7.0231  |
|           |                                    | Colgate optic volcano mineral (CW) | 0.90082    | 4.62302 | 0.847 | -8.4844  | 10.2861  |
|           |                                    | Oral B 3D Fresh breathe (3DW)      | -14.76598* | 4.62302 | 0.003 | -24.1512 | -5.3807  |
| 12 months | Oral B Gum and enamel (C)          | ZACT Stain fighter (ZW)            | -14.70278* | 3.52178 | 0.000 | -21.8524 | -7.5532  |
|           |                                    | Colgate optic volcano mineral (CW) | 7.04980    | 3.52178 | 0.053 | -0.0998  | 14.1994  |
|           |                                    | Oral B 3D Fresh breathe (3DW)      | -12.90626* | 3.52178 | 0.001 | -20.0558 | -5.7567  |
|           |                                    | Thepthai herbal toothpaste(TW)     | 1.33121    | 3.52178 | 0.708 | -5.8184  | 8.4808   |
|           | ZACT Stain fighter (ZW)            | Oral B Gum and enamel (C)          | 14.70278*  | 3.52178 | 0.000 | 7.5532   | 21.8524  |
|           |                                    | Colgate optic volcano mineral (CW) | 21.75257*  | 3.52178 | 0.000 | 14.6030  | 28.9022  |
|           |                                    | Oral B 3D Fresh breathe (3DW)      | 1.79652    | 3.52178 | 0.613 | -5.3531  | 8.9461   |
|           |                                    | Thepthai herbal toothpaste(TW)     | 16.03399*  | 3.52178 | 0.000 | 8.8844   | 23.1836  |
|           | Colgate optic volcano mineral (CW) | Oral B Gum and enamel (C)          | -7.04980   | 3.52178 | 0.053 | -14.1994 | 0.0998   |
|           |                                    | ZACT Stain fighter (ZW)            | -21.75257* | 3.52178 | 0.000 | -28.9022 | -14.6030 |
|           |                                    | Oral B 3D Fresh breathe (3DW)      | -19.95606* | 3.52178 | 0.000 | -27.1056 | -12.8065 |
|           |                                    | Thepthai herbal toothpaste(TW)     | -5.71858   | 3.52178 | 0.113 | -12.8682 | 1.4310   |
|           | Oral B 3D Fresh breathe (3DW)      | Oral B Gum and enamel (C)          | 12.90626*  | 3.52178 | 0.001 | 5.7567   | 20.0558  |
|           |                                    | ZACT Stain fighter (ZW)            | -1.79652   | 3.52178 | 0.613 | -8.9461  | 5.3531   |
|           |                                    | Colgate optic volcano mineral (CW) | 19.95606*  | 3.52178 | 0.000 | 12.8065  | 27.1056  |
|           |                                    | Thepthai herbal toothpaste(TW)     | 14.23747*  | 3.52178 | 0.000 | 7.0879   | 21.3871  |
|           | Thepthai herbal toothpaste(TW)     | Oral B Gum and enamel (C)          | -1.33121   | 3.52178 | 0.708 | -8.4808  | 5.8184   |
|           |                                    | ZACT Stain fighter (ZW)            | -16.03399* | 3.52178 | 0.000 | -23.1836 | -8.8844  |
|           |                                    | Colgate optic volcano mineral (CW) | 5.71858    | 3.52178 | 0.113 | -1.4310  | 12.8682  |
|           |                                    | Oral B 3D Fresh breathe (3DW)      | -14.23747* | 3.52178 | 0.000 | -21.3871 | -7.0879  |

\*. The mean difference is significant at the 0.05 level.

**Table S7.** Dunn's post hoc test showed multiple comparison of  $\Delta E_{00}$  among time points of each toothpaste.

| Toothpaste                          | Time points          | Test Statistic | Std. Error | Std. Test Statistic | Sig.  |
|-------------------------------------|----------------------|----------------|------------|---------------------|-------|
| Oral-B gum and enamel (C)           | 2 weeks - 6 months   | 0.375          | 0.645      | 0.581               | 0.561 |
|                                     | 2 weeks - 4 weeks    | 0.750          | 0.645      | 1.162               | 0.245 |
|                                     | 2 weeks - 12 months  | 2.375          | 0.645      | 3.679               | 0.000 |
|                                     | 6 months - 4 weeks   | -0.375         | 0.645      | -0.581              | 0.561 |
|                                     | 6 months - 12 months | 2.000          | 0.645      | 3.098               | 0.002 |
|                                     | 4 weeks - 12 months  | 1.625          | 0.645      | 2.517               | 0.012 |
| ZACT Staing fighter (ZW)            | 2 weeks - 4 weeks    | 1.000          | 0.645      | 1.549               | 0.121 |
|                                     | 2 weeks - 6 months   | 2.000          | 0.645      | 3.098               | 0.002 |
|                                     | 2 weeks - 12 months  | 3.000          | 0.645      | 4.648               | 0.000 |
|                                     | 4 weeks - 6 months   | 1.000          | 0.645      | 1.549               | 0.121 |
|                                     | 4 weeks -12 months   | 2.000          | 0.645      | 3.098               | 0.002 |
|                                     | 6 months -12 months  | 1.000          | 0.645      | 1.549               | 0.121 |
| Colgate optic volcanic mineral (CW) | 2 weeks - 4 weeks    | 0.250          | 0.645      | 0.387               | 0.699 |
|                                     | 2 weeks - 6 months   | 1.000          | 0.645      | 1.549               | 0.121 |
|                                     | 2 weeks -12 months   | 2.250          | 0.645      | 3.486               | 0.000 |
|                                     | 4 weeks - 6 months   | 0.750          | 0.645      | 1.162               | 0.245 |
|                                     | 4 weeks -12 months   | 2.000          | 0.645      | 3.098               | 0.002 |
|                                     | 6 months -12 months  | 1.250          | 0.645      | 1.936               | 0.053 |
| Oral B 3D Fresh breath (3DW)        | 2 weeks - 4 weeks    | 1.000          | 0.645      | 1.549               | 0.121 |
|                                     | 2 weeks - 6 months   | 2.125          | 0.645      | 3.292               | 0.001 |
|                                     | 2 weeks -12 months   | 2.875          | 0.645      | 4.454               | 0.000 |
|                                     | 4 weeks - 6 months   | 1.125          | 0.645      | 1.743               | 0.081 |
|                                     | 4 weeks -12 months   | 1.875          | 0.645      | 2.905               | 0.004 |
|                                     | 6 months -12 months  | 0.750          | 0.645      | 1.162               | 0.245 |
| Thepthai (TW)                       | 2 weeks - 6 months   | 0.500          | 0.645      | 0.775               | 0.439 |
|                                     | 2 weeks - 4 weeks    | 0.625          | 0.645      | 0.968               | 0.333 |
|                                     | 2 weeks -12 months   | 2.375          | 0.645      | 3.679               | 0.000 |
|                                     | 6 months - 4 weeks   | -0.125         | 0.645      | -0.194              | 0.846 |
|                                     | 6 months -12 months  | 1.875          | 0.645      | 2.905               | 0.004 |
|                                     | 4 weeks -12 months   | 1.750          | 0.645      | 2.711               | 0.007 |
